# Supplementary material
Source: PubMed Central journal article supplement (PMC4340655)
Supplement: NIHMS664955-supplement-supplement_1.pdf [file NIHMS664955-supplement-supplement_1.pdf]

Supplementary Figure

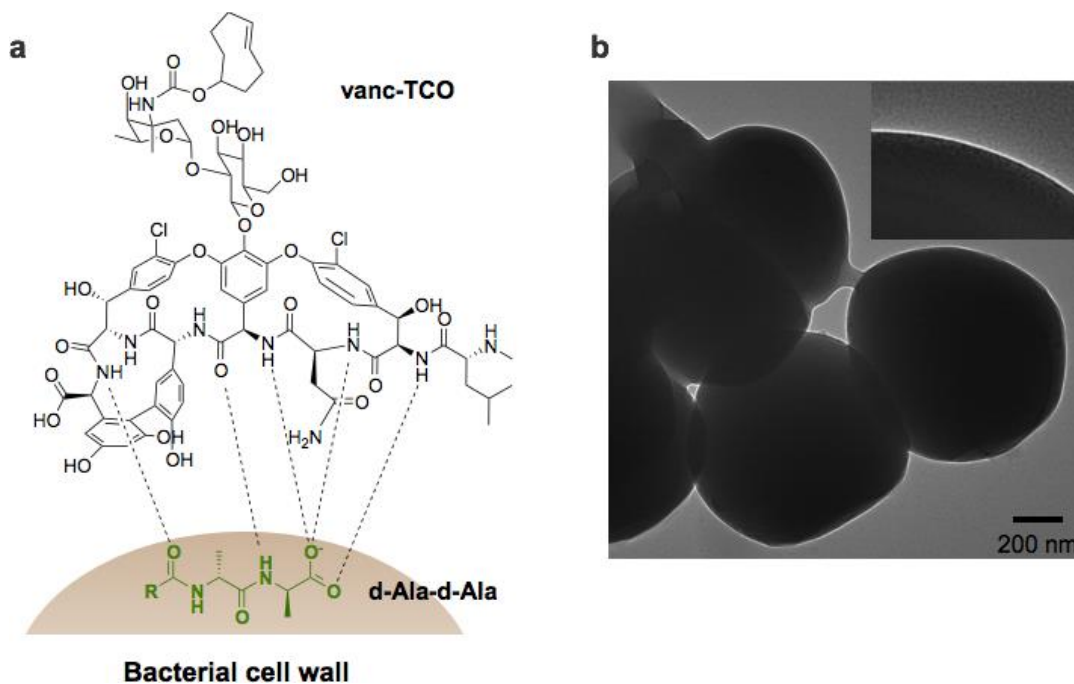

**Figure S1. Bacterial targeting using *trans*-cyclooctene-modified vancomycin (vanc-TCO).** (a) Vancomycin, which binds to d-Ala-d-Ala moieties in Gram-positive bacterial cell wall, was used as the labeling agent. The antibiotic was derivatized with *trans*-cyclooctene (TCO) to provide a facile handle for coupling with tetrazine (Tz)-modified MNPs. (b) Control bacterial samples (*S. aureus*) were prepared without pre-targeting with vanc-TCO, and showed negligible particle binding following incubation with MNP-Tz.
